# Supplementary material for: Ternary and quaternary phase diagrams: key tools for chiral resolution through solution cocrystallization
Source: Royal Society of Chemistry journal article supplement (doi:10.1039/c3ce41141a), 2013-01-01
Supplement: c3ce41141a.pdf [file c3ce41141a.pdf]

SUPPORTING INFORMATION

**Ternary and quaternary Phase Diagrams: Key Tools for Chiral Resolution through solution Cocrystallization.**

Géraldine Springuel, Laurent Collard and Tom Leysens

Institute of Condensed Matter and Nanosciences, Université Catholique de Louvain, Louvain-La-Neuve, Belgium

Here, we present all the data used to create the diagrams presented in the main text (Tables 1 – 5), as well as a schematic representation of a quaternary phase diagram wherein a diastereomeric pair of cocrystals is formed involving both enantiomers of the target molecule and the chiral conformer. In this case the overall resolution system is no longer enantiospecific.

TABLE 1. Data used to create the cross-section “fixed solvent molar percentage” at 9°C. (Figure 6)

| Ternary Phase Diagrams at 9°C for a given amount of acetonitrile (89 mol%). |                            |          |          |                                 |                            |           |             |          |          |          |
|-----------------------------------------------------------------------------|----------------------------|----------|----------|---------------------------------|----------------------------|-----------|-------------|----------|----------|----------|
|                                                                             | Initial system composition |          |          | Final solid state in suspension | Final solution composition |           |             |          |          |          |
|                                                                             | %mol S-2                   | %mol R-1 | %mol S-1 | XRPD analysis <sup>1</sup>      | Reverse HPLC               |           | Chiral HPLC |          |          |          |
|                                                                             |                            |          |          |                                 | mg/l S-2                   | mg/l RS-1 | % R-1       | %mol S-2 | %mol R-1 | %mol S-1 |
| 1                                                                           | 96.96                      | 1.52     | 1.52     | I                               | 269.62                     | 26.69     | 49.96       | 90.99    | 4.50     | 4.51     |
| 2                                                                           | 95.53                      | 2.23     | 2.23     | I                               | 323.98                     | 38.74     | 48.38       | 89.32    | 5.17     | 5.51     |
| 3                                                                           | 93.12                      | 3.44     | 3.44     | I                               | 314.36                     | 55.01     | 53.17       | 85.11    | 7.92     | 6.97     |
| 4                                                                           | 86.08                      | 6.96     | 6.96     | I                               | 370.58                     | 99.73     | 50.94       | 78.79    | 10.80    | 10.40    |
| 5                                                                           | 79.51                      | 10.24    | 10.24    | I                               | 453.24                     | 149.30    | 49.06       | 75.22    | 12.16    | 12.62    |
| 6                                                                           | 73.68                      | 13.16    | 13.16    | -                               | 447.43                     | 180.97    | 48.9        | 71.20    | 14.08    | 14.72    |
| 7                                                                           | 68.17                      | 15.91    | 15.91    | -                               | 452.83                     | 239.03    | 49.73       | 65.45    | 17.18    | 17.37    |
| 8                                                                           | 63.22                      | 18.39    | 18.39    | -                               | 321.89                     | 206.73    | 49.05       | 60.89    | 19.18    | 19.93    |
| 9                                                                           | 60.40                      | 19.80    | 19.80    | -                               | 347.01                     | 251.84    | 50.21       | 57.95    | 21.12    | 20.94    |
| 10                                                                          | 58.50                      | 20.75    | 20.75    | -                               | 331.92                     | 259.28    | 51.82       | 56.14    | 22.73    | 21.13    |
| 11                                                                          | 68.02                      | 13.33    | 18.65    | -                               | 352.74                     | 184.67    | 39.58       | 65.64    | 13.60    | 20.76    |
| 12                                                                          | 68.15                      | 10.58    | 21.27    | -                               | 382.66                     | 134.59    | 24.67       | 73.98    | 6.42     | 19.60    |
| 13                                                                          | 68.07                      | 8.00     | 23.94    | II                              | 338.78                     | 148.40    | 32.12       | 69.54    | 9.78     | 20.68    |
| 14                                                                          | 64.33                      | 13.69    | 21.97    | II                              | 319.90                     | 180.34    | 46.28       | 63.95    | 16.68    | 19.37    |
| 15                                                                          | 64.32                      | 10.95    | 24.73    | II                              | 292.30                     | 154.56    | 41.49       | 65.41    | 14.35    | 20.24    |
| 16                                                                          | 64.40                      | 8.22     | 27.39    | II                              | 304.68                     | 150.91    | 35.76       | 66.88    | 11.84    | 21.28    |
| 17                                                                          | 60.41                      | 14.14    | 25.45    | II                              | 265.44                     | 172.63    | 46.63       | 60.59    | 18.38    | 21.03    |
| 18                                                                          | 60.31                      | 11.37    | 28.32    | II                              | 263.10                     | 162.10    | 41.6        | 61.88    | 15.86    | 22.26    |
| 19                                                                          | 60.33                      | 8.50     | 31.18    | II                              | 237.73                     | 136.26    | 36.89       | 63.57    | 13.44    | 22.99    |
| 20                                                                          | 64.37                      | 15.74    | 19.89    | -                               | 339.12                     | 208.11    | 42.91       | 61.97    | 16.32    | 21.71    |

<sup>1</sup> I= S-2 ; II= S-1-S2 co-crystal ; IV= RS-1 ; - = Liquid

|    |       |       |       |         |        |        |       |       |       |       |
|----|-------|-------|-------|---------|--------|--------|-------|-------|-------|-------|
| 21 | 60.28 | 15.61 | 24.11 | II      | 296.14 | 197.94 | 49.96 | 59.94 | 20.02 | 20.05 |
| 22 | 60.41 | 18.40 | 21.19 | -       | 329.06 | 238.24 | 46.26 | 58.00 | 19.43 | 22.57 |
| 23 | 57.45 | 15.22 | 27.33 | II      | 255.83 | 189.40 | 48.76 | 57.46 | 20.74 | 21.80 |
| 24 | 57.40 | 16.71 | 25.89 | II      | 277.76 | 211.54 | 49.58 | 56.77 | 21.43 | 21.80 |
| 25 | 57.48 | 19.72 | 22.80 | II      | 280.62 | 219.07 | 51.56 | 56.16 | 22.60 | 21.24 |
| 26 | 74.16 | 6.46  | 19.38 | II      | 392.17 | 158.47 | 24.22 | 71.22 | 6.97  | 21.81 |
| 27 | 83.25 | 5.29  | 11.46 | I       | 415.72 | 121.52 | 32.88 | 77.38 | 7.44  | 15.18 |
| 28 | 79.61 | 5.07  | 15.32 | I       | 428.96 | 158.21 | 22.44 | 73.06 | 6.05  | 20.90 |
| 29 | 35.69 | 13.39 | 50.92 | II + IV | 100.72 | 182.96 | 14.63 | 35.50 | 9.44  | 55.06 |
| 30 | 36.18 | 15.93 | 47.89 | II + IV | 90.81  | 141.89 | 22.47 | 39.03 | 13.70 | 47.27 |
| 31 | 41.69 | 13.26 | 45.05 | II + IV | 130.25 | 167.25 | 27.82 | 43.78 | 15.64 | 40.58 |
| 32 | 57.33 | 21.33 | 21.33 | II      | 311.98 | 271.75 | 53.96 | 53.45 | 25.12 | 21.43 |
| 33 | 54.37 | 22.82 | 22.82 | -       | 287.81 | 282.92 | 48.97 | 50.43 | 24.28 | 25.30 |
| 34 | 79.61 | 3.70  | 16.68 | I+II    | 320.96 | 109.33 | 27.67 | 74.59 | 7.03  | 18.38 |
| 35 | 77.02 | 3.85  | 19.13 | I + II  | 399.73 | 139.25 | 23.6  | 74.16 | 6.10  | 19.74 |
| 36 | 74.36 | 3.85  | 21.79 | I + II  | 306.51 | 104.42 | 20.28 | 74.59 | 5.15  | 20.26 |

TABLE 2. Data used to create the cross-section “fixed solvent molar percentage” at -10°C. (Figure 6)

| Ternary Phase Diagrams at -10°C and appointed molar percentage of 89 mol% of acetonitrile. |                     |          |       |                                 |                            |              |       |             |          |          |
|--------------------------------------------------------------------------------------------|---------------------|----------|-------|---------------------------------|----------------------------|--------------|-------|-------------|----------|----------|
|                                                                                            | Initial composition |          |       | Final solid state in suspension | Final liquid composition   |              |       |             |          |          |
|                                                                                            |                     |          |       |                                 | XRPD analysis <sup>2</sup> | Reverse HPLC |       | Chiral HPLC |          |          |
| %mol S-2                                                                                   | %mol R-1            | %mol S-1 |       | mg/l S-2                        |                            | mg/l RS-1    | % R-1 | %mol S-2    | %mol R-1 | %mol S-1 |
| 1                                                                                          | 93.03               | 3.48     | 3.48  | I                               | 213.37                     | 62.47        | 50.05 | 79.26       | 10.38    | 10.36    |
| 2                                                                                          | 86.16               | 6.92     | 6.92  | I                               | 282.37                     | 114.90       | 44.52 | 73.33       | 11.87    | 14.80    |
| 3                                                                                          | 79.55               | 10.22    | 10.22 | I + II                          | 248.70                     | 106.53       | 65.6  | 72.31       | 18.16    | 9.52     |
| 4                                                                                          | 73.51               | 13.24    | 13.24 | I + II                          | 303.96                     | 141.92       | 71.58 | 70.55       | 21.08    | 8.37     |
| 5                                                                                          | 67.91               | 16.05    | 16.05 | I + II                          | 355.66                     | 180.66       | 72.69 | 68.77       | 22.70    | 8.53     |
| 6                                                                                          | 63.23               | 18.38    | 18.38 | II                              | 411.99                     | 226.43       | 75.93 | 67.06       | 25.01    | 7.93     |
| 7                                                                                          | 67.78               | 13.40    | 18.83 | I + II                          | 328.50                     | 156.77       | 73.31 | 70.10       | 21.92    | 7.98     |
| 8                                                                                          | 60.16               | 19.92    | 19.92 | II                              | 296.02                     | 175.27       | 75.15 | 65.39       | 26.01    | 8.60     |
| 9                                                                                          | 58.56               | 20.72    | 20.72 | II                              | 315.06                     | 204.97       | 74.69 | 63.23       | 27.46    | 9.31     |
| 10                                                                                         | 86.96               | 1.29     | 11.75 | I + II                          | 167.48                     | 74.80        | 68.95 | 71.47       | 19.67    | 8.86     |
| 11                                                                                         | 68.00               | 5.34     | 26.65 | I + II                          | 243.03                     | 80.44        | 56.84 | 77.17       | 12.98    | 9.85     |
| 12                                                                                         | 64.28               | 13.74    | 21.98 | II                              | 306.62                     | 132.04       | 71.64 | 72.21       | 19.91    | 7.88     |
| 13                                                                                         | 64.05               | 8.37     | 27.58 | II                              | 286.50                     | 99.93        | 60.23 | 76.23       | 14.32    | 9.45     |
| 14                                                                                         | 60.00               | 11.52    | 28.48 | II                              | 231.67                     | 113.55       | 68.85 | 69.53       | 20.98    | 9.49     |
| 15                                                                                         | 59.99               | 8.59     | 31.42 | II                              | 228.66                     | 97.01        | 66.1  | 72.50       | 18.18    | 9.32     |
| 16                                                                                         | 60.25               | 15.56    | 24.19 | II                              | 293.45                     | 157.53       | 73.05 | 67.57       | 23.69    | 8.74     |

<sup>2</sup> I33= S-2 ; II= S-1 :S-2 co-crystal ; IV= RS-1 ; V= R-1 ; -=Liquid

|    |       |       |       |         |        |        |       |       |       |       |
|----|-------|-------|-------|---------|--------|--------|-------|-------|-------|-------|
| 17 | 57.26 | 15.22 | 27.52 | II      | 146.85 | 94.59  | 74.2  | 63.46 | 27.11 | 9.43  |
| 18 | 57.47 | 19.70 | 22.84 | II      | 272.96 | 179.96 | 75.63 | 62.92 | 28.04 | 9.04  |
| 19 | 74.27 | 6.39  | 19.34 | I + II  | 221.68 | 78.73  | 57.66 | 75.90 | 13.89 | 10.20 |
| 20 | 83.50 | 5.49  | 11.01 | I + II  | 214.18 | 72.25  | 55.85 | 76.83 | 12.94 | 10.23 |
| 21 | 79.55 | 5.09  | 15.36 | I + II  | 215.12 | 70.97  | 55.99 | 77.23 | 12.75 | 10.02 |
| 22 | 35.90 | 13.49 | 50.61 | II + IV | 82.76  | 128.60 | 13.03 | 41.86 | 7.58  | 50.57 |
| 23 | 35.64 | 16.07 | 48.29 | II + IV | 33.57  | 40.92  | 47.62 | 47.86 | 24.83 | 27.31 |
| 24 | 41.53 | 13.30 | 45.17 | II + IV | 112.10 | 97.11  | 23.1  | 56.36 | 10.08 | 33.56 |
| 25 | 49.95 | 25.03 | 25.03 | II + IV | 262.49 | 165.48 | 76.71 | 63.96 | 27.65 | 8.39  |
| 26 | 47.31 | 13.12 | 39.57 | II + IV | 183.05 | 134.45 | 32.12 | 60.37 | 12.73 | 26.90 |
| 27 | 48.09 | 17.21 | 34.70 | II + IV | 196.02 | 134.32 | 54.3  | 62.01 | 20.63 | 17.36 |
| 28 | 41.96 | 20.37 | 37.67 | II + IV | 159.46 | 104.69 | 68.67 | 63.02 | 25.40 | 11.59 |
| 29 | 38.07 | 24.78 | 37.15 | II + IV | 131.54 | 83.71  | 62.82 | 63.74 | 22.78 | 13.48 |
| 30 | 57.73 | 21.13 | 21.13 | II      | 304.23 | 187.35 | 76.69 | 64.50 | 27.23 | 8.28  |
| 31 | 54.33 | 22.84 | 22.84 | II      | 250.06 | 200.54 | 76.33 | 58.25 | 31.87 | 9.88  |
| 32 | 68.45 | 18.49 | 13.06 | I + II  |        |        |       |       |       |       |
| 33 | 68.07 | 21.23 | 10.70 | -       |        |        |       |       |       |       |
| 34 | 68.41 | 26.36 | 5.23  | -       |        |        |       |       |       |       |
| 35 | 64.41 | 21.95 | 13.64 | II      |        |        |       |       |       |       |
| 36 | 64.14 | 27.48 | 8.38  | -       |        |        |       |       |       |       |
| 37 | 59.86 | 28.69 | 11.44 | IV      |        |        |       |       |       |       |
| 38 | 59.99 | 31.52 | 8.49  | IV      |        |        |       |       |       |       |
| 39 | 60.24 | 24.10 | 15.67 | II      |        |        |       |       |       |       |
| 40 | 60.21 | 19.89 | 19.89 | II      |        |        |       |       |       |       |
| 41 | 58.57 | 20.72 | 20.72 | II      |        |        |       |       |       |       |
| 42 | 86.96 | 11.76 | 1.29  | I       |        |        |       |       |       |       |
| 43 | 56.81 | 23.86 | 19.33 | II + IV |        |        |       |       |       |       |
| 44 | 74.64 | 19.01 | 6.35  | I       |        |        |       |       |       |       |
| 45 | 83.22 | 11.25 | 5.53  | I       |        |        |       |       |       |       |
| 46 | 79.41 | 15.47 | 5.12  | I       |        |        |       |       |       |       |
| 47 | 35.97 | 50.69 | 13.34 | IV + V  |        |        |       |       |       |       |
| 48 | 36.19 | 47.78 | 16.03 | IV + V  |        |        |       |       |       |       |
| 49 | 41.66 | 45.13 | 13.21 | IV + V  |        |        |       |       |       |       |
| 50 | 47.42 | 39.43 | 13.15 | IV + V  |        |        |       |       |       |       |
| 51 | 46.53 | 36.40 | 17.07 | IV      |        |        |       |       |       |       |
| 52 | 41.30 | 38.46 | 20.24 | IV      |        |        |       |       |       |       |
| 53 | 38.26 | 37.13 | 24.61 | IV      |        |        |       |       |       |       |
| 54 | 57.52 | 21.24 | 21.24 | II      |        |        |       |       |       |       |
| 55 | 53.90 | 23.05 | 23.05 | II      |        |        |       |       |       |       |

- For points 32 up to 55 HPLC analysis was not performed. For these points, only the information on the nature of the Solid state phases was used.

TABLE 3. Data used to create the cross-section “Racemic composition plane” at -10°C. (Figure 7)

| Racemic composition cross-section at -10°C |                     |          |          |                   |                                                               |                          |            |             |          |          |          |          |
|--------------------------------------------|---------------------|----------|----------|-------------------|---------------------------------------------------------------|--------------------------|------------|-------------|----------|----------|----------|----------|
|                                            | Initial composition |          |          |                   | Final solid state in suspension<br>XRPD analysis <sup>3</sup> | Final liquid composition |            |             |          |          |          |          |
|                                            |                     |          |          |                   |                                                               | Reverse HPLC             |            | Chiral HPLC |          |          |          |          |
|                                            | %mol S-2            | %mol R-1 | %mol S-1 | %mol Acetonitrile |                                                               | mg/ml S-2                | mg/ml RS-1 | % R-1       | %mol S-2 | %mol R-1 | %mol S-1 | %mol ACN |
| 1                                          | 6.80                | 0.09     | 0.096    | 93                | I                                                             | 55.88                    | 0.96       | 44.32       | 1.88     | 0.02     | 0.01     | 98.09    |
| 2                                          | 6.64                | 0.17     | 0.17     | 93                | I                                                             | 40.14                    | 3.49       | 53.02       | 1.36     | 0.05     | 0.06     | 98.54    |
| 3                                          | 6.34                | 0.32     | 0.32     | 93                | I                                                             | 75.32                    | 16.23      | 52.25       | 2.51     | 0.23     | 0.25     | 97.01    |
| 4                                          | 6.13                | 0.43     | 0.43     | 93                | I                                                             | 85.38                    | 23.70      | 48.95       | 2.83     | 0.36     | 0.34     | 96.47    |
| 5                                          | 5.82                | 0.58     | 0.58     | 93                | I                                                             | 101.63                   | 33.58      | 51.66       | 3.34     | 0.48     | 0.51     | 95.68    |
| 6                                          | 5.50                | 0.74     | 0.74     | 93                | I                                                             | 112.62                   | 42.45      | 49.42       | 3.68     | 0.63     | 0.61     | 95.09    |
| 7                                          | 4.90                | 1.04     | 1.04     | 93                | -                                                             | 106.95                   | 56.44      | 61.21       | 3.48     | 0.64     | 1.01     | 94.87    |
| 8                                          | 4.55                | 1.22     | 1.22     | 93                | II                                                            | 88.71                    | 57.06      | 66.17       | 2.91     | 0.57     | 1.11     | 95.42    |
| 9                                          | 4.25                | 1.37     | 1.37     | 93                | II                                                            | 86.09                    | 53.13      | 52.05       | 2.83     | 0.75     | 0.81     | 95.62    |
| 10                                         | 3.69                | 1.65     | 1.65     | 93                | IV                                                            | 84.85                    | 52.40      | 49.44       | 2.79     | 0.78     | 0.76     | 95.68    |
| 11                                         | 3.36                | 1.81     | 1.81     | 93                | IV                                                            | 67.61                    | 42.27      | 50.26       | 2.24     | 0.62     | 0.63     | 96.51    |
| 12                                         | 3.05                | 1.97     | 1.97     | 93                | IV                                                            | 70.57                    | 50.13      | 48.86       | 2.33     | 0.76     | 0.72     | 96.19    |
| 13                                         | 2.74                | 2.12     | 2.12     | 93                | IV                                                            | 49.54                    | 32.99      | 51.81       | 1.66     | 0.47     | 0.51     | 97.36    |
| 14                                         | 2.07                | 2.46     | 2.46     | 93                | IV                                                            | 29.79                    | 23.25      | 49.5        | 1.01     | 0.35     | 0.35     | 0.98     |
| 15                                         | 1.44                | 2.77     | 2.77     | 93                | IV                                                            | 55.88                    | 0.96       | 61.21       | 1.88     | 0.02     | 0.01     | 98.09    |
| 16                                         | 10.23               | 0.38     | 0.38     | 89                | I                                                             | 106.69                   | 31.24      | 50.05       | 3.50     | 0.46     | 0.46     | 95.58    |
| 17                                         | 9.48                | 0.76     | 0.76     | 89                | I                                                             | 141.18                   | 57.45      | 44.52       | 4.55     | 0.74     | 0.92     | 93.80    |
| 18                                         | 8.75                | 1.12     | 1.12     | 89                | I + II                                                        | 124.35                   | 53.27      | 65.6        | 4.03     | 1.01     | 0.53     | 94.43    |
| 19                                         | 8.09                | 1.46     | 1.46     | 89                | I + II                                                        | 151.98                   | 70.96      | 71.58       | 4.86     | 1.45     | 0.58     | 93.11    |
| 20                                         | 7.47                | 1.77     | 1.77     | 89                | I + II                                                        | 177.83                   | 90.33      | 72.69       | 5.61     | 1.85     | 0.70     | 91.85    |
| 21                                         | 6.96                | 2.02     | 2.02     | 89                | II                                                            | 205.99                   | 113.22     | 75.93       | 6.40     | 2.39     | 0.76     | 90.46    |
| 22                                         | 6.62                | 2.19     | 2.19     | 89                | II                                                            | 148.01                   | 87.63      | 75.15       | 4.71     | 1.88     | 0.62     | 92.79    |
| 23                                         | 6.44                | 2.28     | 2.28     | 89                | II                                                            | 157.53                   | 102.48     | 74.69       | 4.98     | 2.16     | 0.73     | 92.12    |
| 24                                         | 6.35                | 2.32     | 2.32     | 89                | II                                                            | 131.24                   | 82.74      | 76.71       | 4.21     | 1.82     | 0.55     | 93.42    |
| 25                                         | 5.98                | 2.51     | 2.51     | 89                | II                                                            | 152.11                   | 93.68      | 76.69       | 4.83     | 2.04     | 0.62     | 92.51    |
| 26                                         | 5.49                | 2.75     | 2.75     | 89                | IV + II                                                       | 125.03                   | 100.27     | 76.33       | 4.00     | 2.19     | 0.68     | 93.14    |
| 27                                         | 14.34               | 0.33     | 0.33     | 85                | I                                                             | 77.25                    | 18.79      | 49.92       | 2.57     | 0.28     | 0.28     | 96.87    |
| 28                                         | 14.00               | 0.50     | 0.50     | 85                | I                                                             | 82.11                    | 26.37      | 53.63       | 2.72     | 0.42     | 0.36     | 96.50    |
| 29                                         | 12.98               | 1.01     | 1.01     | 85                | I                                                             | 128.09                   | 59.57      | 50.27       | 4.14     | 0.87     | 0.86     | 94.14    |
| 30                                         | 11.91               | 1.54     | 1.54     | 85                | I+II                                                          | 137.48                   | 66.11      | 72.35       | 4.42     | 1.37     | 0.53     | 93.68    |
| 31                                         | 11.04               | 1.98     | 1.98     | 85                | I+II                                                          | 155.93                   | 80.95      | 74.79       | 4.96     | 1.72     | 0.58     | 92.73    |
| 32                                         | 10.28               | 2.36     | 2.36     | 85                | I+II                                                          | 169.43                   | 45.50      | 75.95       | 5.42     | 0.99     | 0.31     | 93.27    |

<sup>3</sup> I= S-2 ; II= S-1 :S-2 co-crystal ; IV= RS-1

|    |      |      |      |    |         |        |        |       |      |      |      |       |
|----|------|------|------|----|---------|--------|--------|-------|------|------|------|-------|
| 33 | 9.02 | 2.99 | 2.99 | 85 | II      | 163.57 | 99.18  | 77.92 | 5.17 | 2.18 | 0.62 | 92.03 |
| 34 | 8.54 | 3.23 | 3.23 | 85 | II      | 170.37 | 124.97 | 78.93 | 5.33 | 2.76 | 0.74 | 91.17 |
| 35 | 7.87 | 3.57 | 3.57 | 85 | II      | 146.04 | 103.23 | 77.25 | 4.63 | 2.26 | 0.67 | 92.44 |
| 36 | 6.72 | 4.14 | 4.14 | 85 | II + IV | 133.88 | 97.39  | 73.47 | 4.27 | 2.04 | 0.74 | 92.95 |
| 37 | 5.95 | 4.53 | 4.53 | 85 | IV      | 154.91 | 93.60  | 49    | 4.92 | 1.30 | 1.35 | 92.43 |

TABLE 4. Data used to create ternary phase diagrams of tetrahedron sides

| Ternary Phase Diagrams, Tertahedron Sides at 9°C                         |                     |        |        |                 |                                 |                            |              |            |             |          |          |          |
|--------------------------------------------------------------------------|---------------------|--------|--------|-----------------|---------------------------------|----------------------------|--------------|------------|-------------|----------|----------|----------|
|                                                                          | Initial composition |        |        |                 | Final solid state in suspension | Final liquid composition   |              |            |             |          |          |          |
|                                                                          |                     |        |        |                 |                                 | XRPD analysis <sup>4</sup> | Reverse HPLC |            | Chiral HPLC |          |          |          |
|                                                                          | mg S-2              | mg R-1 | mg S-1 | ml Acetonitrile |                                 |                            | mg/ml S-2    | mg/ml RS-1 | % R-1       | %mol S-2 | %mol R-1 | %mol S-1 |
| <b>Ternary phase diagram of chiral API (front side, Figure 3)</b>        |                     |        |        |                 |                                 |                            |              |            |             |          |          |          |
| 1                                                                        |                     | 0.00   | 68.93  | 1               | III                             |                            | 23.762       | 50         |             | 0        | 0.72     | 99.28    |
| 2                                                                        |                     | 33.91  | 33.91  | 1               | IV                              |                            | 20.001       | 49.52      |             | 0.30     | 0.31     | 99.39    |
| 3                                                                        |                     | 36.60  | 41.46  | 1               | IV                              |                            | 19.992       | 37.45      |             | 0.24     | 0.37     | 99.39    |
| 4                                                                        |                     | 34.65  | 44.60  | 1               | IV                              |                            | 21.382       | 30.12      |             | 0.22     | 0.43     | 99.35    |
| 5                                                                        |                     | 35.39  | 56.83  | 1               | IV                              |                            | 30.433       | 14.62      |             | 0.16     | 0.76     | 99.07    |
| 6                                                                        |                     | 6.05   | 72.73  | 1               | IV                              |                            | 32.429       | 12.58      |             | 0.17     | 0.81     | 99.01    |
| 7                                                                        |                     | 22.30  | 67.17  | 1               | IV                              |                            | 25.893       | 12.75      |             | 0.19     | 0.59     | 99.21    |
| 8                                                                        |                     | 35.17  | 50.96  | 1               | III                             |                            | 36.299       | 19.75      |             | 0.11     | 0.99     | 98.90    |
| 9                                                                        |                     | 1.38   | 72.01  | 1               | III                             |                            | 38.660       | 4.66       |             | 0.16     | 1.01     | 98.83    |
| 10                                                                       |                     | 2.43   | 72.81  | 1               | IV                              |                            | 34.870       | 9.38       |             | 0.18     | 0.88     | 98.94    |
| <b>Ternary phase diagram of cocrystal system (righth side, Figure 4)</b> |                     |        |        |                 |                                 |                            |              |            |             |          |          |          |
| 11                                                                       | 254.99              |        | 0.00   | 1               | I                               | 72.72                      | 0.00         |            | 2.44        |          | 0        | 97.56    |
| 12                                                                       | 0.00                |        | 68.93  | 1               | III                             | 0.00                       | 23.76        |            | 0           |          | 0.72     | 99.28    |
| 13                                                                       | 231.63              |        | 105.20 | 1               | II                              | 120.77                     | 34.87        |            | 3.94        |          | 1.02     | 95.04    |
| 14                                                                       | 201.66              |        | 99.39  | 1               | II                              | 107.12                     | 33.25        |            | 3.51        |          | 0.97     | 95.51    |
| 15                                                                       | 231.62              |        | 81.72  | 1               | II                              | 110.67                     | 31.49        |            | 3.63        |          | 0.92     | 95.45    |
| 16                                                                       | 230.85              |        | 109.78 | 1               | II                              | 105.75                     | 31.49        |            | 3.47        |          | 0.92     | 95.61    |
| 17                                                                       | 10.38               |        | 67.69  | 1               | III                             | 11.09                      | 26.06        |            | 0.38        |          | 0.79     | 98.83    |
| 18                                                                       | 250.80              |        | 14.18  | 1               | I                               | 94.88                      | 12.11        |            | 3.14        |          | 0.36     | 96.50    |
| 19                                                                       | 226.45              |        | 99.60  | 1               | II                              | 124.27                     | 35.69        |            | 4.05        |          | 1.04     | 94.91    |
| 20                                                                       | 257.06              |        | 38.16  | 1               | I                               | 154.66                     | 60.77        |            | 4.95        |          | 1.74     | 93.31    |
| 21                                                                       | 229.45              |        | 79.54  | 1               | II                              | 101.35                     | 33.39        |            | 3.33        |          | 0.98     | 95.69    |
| 22                                                                       | 219.76              |        | 92.47  | 1               | II                              | 91.67                      | 29.07        |            | 3.02        |          | 0.86     | 96.12    |
| 23                                                                       | 212.07              |        | 102.66 | 1               | II                              | 85.60                      | 29.44        |            | 2.83        |          | 0.87     | 96.30    |
| 24                                                                       | 198.55              |        | 109.98 | 1               | III                             | 102.31                     | 50.07        |            | 3.34        |          | 1.46     | 95.19    |
| 25                                                                       | 220.33              |        | 109.35 | 1               | III                             | 114.47                     | 54.71        |            | 3.72        |          | 1.59     | 94.69    |

<sup>4</sup> I= S-2 ; II= S-1 :S-2 co-crystal ; III=S-1 ; IV= RS-1 ; V=R-1

|                                                                                      |        |       |        |   |    |        |       |  |      |      |      |       |
|--------------------------------------------------------------------------------------|--------|-------|--------|---|----|--------|-------|--|------|------|------|-------|
| 26                                                                                   | 227.61 |       | 101.03 | 1 | II | 129.06 | 40.97 |  | 4.19 |      | 1.19 | 94.62 |
| <b>Ternary phase diagram of a non-cocrystal forming system (back side, Figure 5)</b> |        |       |        |   |    |        |       |  |      |      |      |       |
| 27                                                                                   | 254.99 | 0.00  |        | 1 | I  | 72.72  | 0.00  |  | 2.44 | 0.00 |      | 97.56 |
| 28                                                                                   | 0.00   | 68.93 |        | 1 | V  | 0.00   | 23.76 |  | 0.00 | 0.72 |      | 99.28 |
| 29                                                                                   | 253.61 | 83.78 |        | 1 | I  | 147.90 | 54.00 |  | 4.76 | 1.55 |      | 93.69 |
| 30                                                                                   | 252.35 | 24.39 |        | 1 | I  | 101.21 | 19.02 |  | 3.34 | 0.56 |      | 96.10 |
| 31                                                                                   | 252.18 | 11.54 |        | 1 | I  | 93.65  | 10.45 |  | 3.10 | 0.31 |      | 96.59 |
| 32                                                                                   | 253.86 | 33.28 |        | 1 | I  | 116.32 | 25.74 |  | 3.81 | 0.75 |      | 95.44 |
| 33                                                                                   | 251.66 | 40.48 |        | 1 | I  | 123.59 | 30.86 |  | 4.03 | 0.90 |      | 95.07 |
| 34                                                                                   | 13.61  | 82.25 |        | 1 | V  | 15.09  | 32.07 |  | 0.51 | 0.97 |      | 98.52 |

TABLE 5. Data used to create ternary phase diagrams of tetrahedron sides

| Ternary Phase Diagrams, Tertahedron Sides at -10°C                      |                     |        |        |                 |                                 |                            |            |              |          |             |          |          |
|-------------------------------------------------------------------------|---------------------|--------|--------|-----------------|---------------------------------|----------------------------|------------|--------------|----------|-------------|----------|----------|
|                                                                         | Initial composition |        |        |                 | Final solid state in suspension | Final liquid composition   |            |              |          |             |          |          |
|                                                                         |                     |        |        |                 |                                 | XRPD analysis <sup>5</sup> |            | Reverse HPLC |          | Chiral HPLC |          |          |
|                                                                         | mg S-2              | mg R-1 | mg S-1 | ml Acetonitrile |                                 | mg/ml S-2                  | mg/ml RS-1 | % R-1        | %mol S-2 | %mol R-1    | %mol S-1 | %mol ACN |
| <b>Ternary phase diagram of chiral API (front side, Figure 3)</b>       |                     |        |        |                 |                                 |                            |            |              |          |             |          |          |
| 1                                                                       |                     | 0      | 66.32  | 1               | III                             |                            | 15.01      | 0            |          | 0           | 0.46     | 99.54    |
| 2                                                                       |                     | 30.58  | 30.58  | 1               | IV                              |                            | 9.92       | 50           |          | 0.15        | 0.15     | 99.70    |
| 3                                                                       |                     | 2.65   | 64.22  | 1               | III + IV                        |                            | 14.38      | 14.87        |          | 0.07        | 0.37     | 99.56    |
| 4                                                                       |                     | 7.6    | 57.67  | 1               | IV                              |                            | 13.57      | 11.79        |          | 0.05        | 0.37     | 99.59    |
| 5                                                                       |                     | 12.84  | 57.71  | 1               | IV                              |                            | 13.71      | 10.59        |          | 0.04        | 0.37     | 99.58    |
| 6                                                                       |                     | 15.11  | 47.23  | 1               | IV                              |                            | 16.63      | 11.21        |          | 0.06        | 0.45     | 99.49    |
| 7                                                                       |                     | 25.01  | 41.67  | 1               | IV                              |                            | 17.57      | 10.72        |          | 0.06        | 0.48     | 99.46    |
| 8                                                                       |                     | 30.00  | 36.31  | 1               | IV                              |                            | 9.36       | 24.35        |          | 0.07        | 0.22     | 99.71    |
| <b>Ternary phase diagram of cocrystal system (right side, Figure 4)</b> |                     |        |        |                 |                                 |                            |            |              |          |             |          |          |
| 9                                                                       | 253.23              |        | 0      | 1               | I                               | 55.60                      | 0          |              | 1.87     |             | 0        | 98.13    |
| 10                                                                      | 0                   |        | 66.32  | 1               | III                             | 0                          | 15.01      |              | 0        |             | 0.46     | 99.54    |
| 11                                                                      | 231.66              |        | 95.92  | 1               | II                              | 83.59                      | 16.98      |              | 2.78     |             | 0.50     | 96.72    |
| 12                                                                      | 193.84              |        | 100.86 | 1               | II                              | 68.06                      | 14.70      |              | 2.27     |             | 0.44     | 97.29    |
| 13                                                                      | 232.17              |        | 82.84  | 1               | II                              | 66.52                      | 13.27      |              | 2.22     |             | 0.40     | 97.38    |
| 14                                                                      | 227.6               |        | 112.13 | 1               | II                              | 83.68                      | 17.32      |              | 2.78     |             | 0.51     | 96.71    |
| 15                                                                      | 9.27                |        | 68.82  | 1               | III                             | 12.28                      | 16.68      |              | 0.42     |             | 0.51     | 99.08    |
| 16                                                                      | 245.8               |        | 11.37  | 1               | I                               | 63.50                      | 11.33      |              | 2.13     |             | 0.34     | 97.54    |
| 17                                                                      | 219.92              |        | 98.2   | 1               | II                              | 105.91                     | 22.10      |              | 3.49     |             | 0.65     | 95.86    |
| 18                                                                      | 252.36              |        | 38.375 | 1               | I + II                          | 61.63                      | 12.42      |              | 2.06     |             | 0.37     | 97.56    |
| 19                                                                      | 32.24               |        | 70.77  | 1               | II + III                        | 0.08                       | 16.67      |              | 0.003    |             | 0.51     | 99.49    |
| 20                                                                      | 73.53               |        | 71.74  | 1               | II                              | 27.62                      | 27.35      |              | 0.93     |             | 0.82     | 98.24    |

<sup>5</sup> I= S-2 ; II= S-1 :S-2 co-crystal ; III=S-1 ; IV= RS-1 ; V=R-1

|                                                                                      |        |       |       |   |       |        |       |  |      |      |      |       |
|--------------------------------------------------------------------------------------|--------|-------|-------|---|-------|--------|-------|--|------|------|------|-------|
| 21                                                                                   | 124.44 |       | 70.82 | 1 | II    | 61.91  | 7.47  |  | 2.08 |      | 0.22 | 97.70 |
| <b>Ternary phase diagram of a non-cocrystal forming system (back side, Figure 5)</b> |        |       |       |   |       |        |       |  |      |      |      |       |
| 22                                                                                   | 253.23 | 0     |       | 1 | I     | 55.60  | 0     |  | 1.87 | 0    |      | 98.13 |
| 23                                                                                   | 0      | 66.32 |       | 1 | III   | 0      | 15.01 |  | 0    | 0.46 |      | 99.54 |
| 24                                                                                   | 243.45 | 81.86 |       | 1 | I + V | 125.74 | 63.55 |  | 4.06 | 1.84 |      | 94.10 |
| 25                                                                                   | 246.70 | 24.09 |       | 1 | I     | 80.44  | 21.92 |  | 2.67 | 0.65 |      | 96.68 |
| 26                                                                                   | 247.88 | 10.14 |       | 1 | I     | 62.62  | 10.21 |  | 2.10 | 0.31 |      | 97.60 |
| 27                                                                                   | 254.78 | 32.38 |       | 1 | I     | 77.37  | 25.30 |  | 2.57 | 0.75 |      | 96.68 |
| 28                                                                                   | 249.96 | 36.81 |       | 1 | I     | 87.48  | 30.25 |  | 2.89 | 0.89 |      | 96.22 |
| 29                                                                                   | 12.64  | 82.89 |       | 1 | V     | 14.55  | 21.45 |  | 0.49 | 0.65 |      | 98.86 |
| 30                                                                                   | 42.73  | 87.98 |       | 1 | V     | 25.88  | 29.34 |  | 0.87 | 0.88 |      | 98.24 |

In the main text, we focused on an enantiospecific cocrystal system, as this is novel with respect to salts. Nevertheless, resolution through cocrystallization in solution remains possible even if a diastereomeric pair of cocrystals is formed. In this case, the ternary phase diagram located on the back side of a tetrahedral diagram, as represented on Figure 1 in the supporting information, has the shape of a ternary phase diagram of a cocrystal system. As the two diastereomeric cocrystals have different physico-chemical properties, in particular solubility, the overall diagram is still asymmetric and the conditions for an effective resolution, listed in the main text, can still be satisfied. On the figure below, ternary phase diagrams represent projections of the sides of the tetrahedron quaternary phase diagram for both cases, clearly indicating the difference.

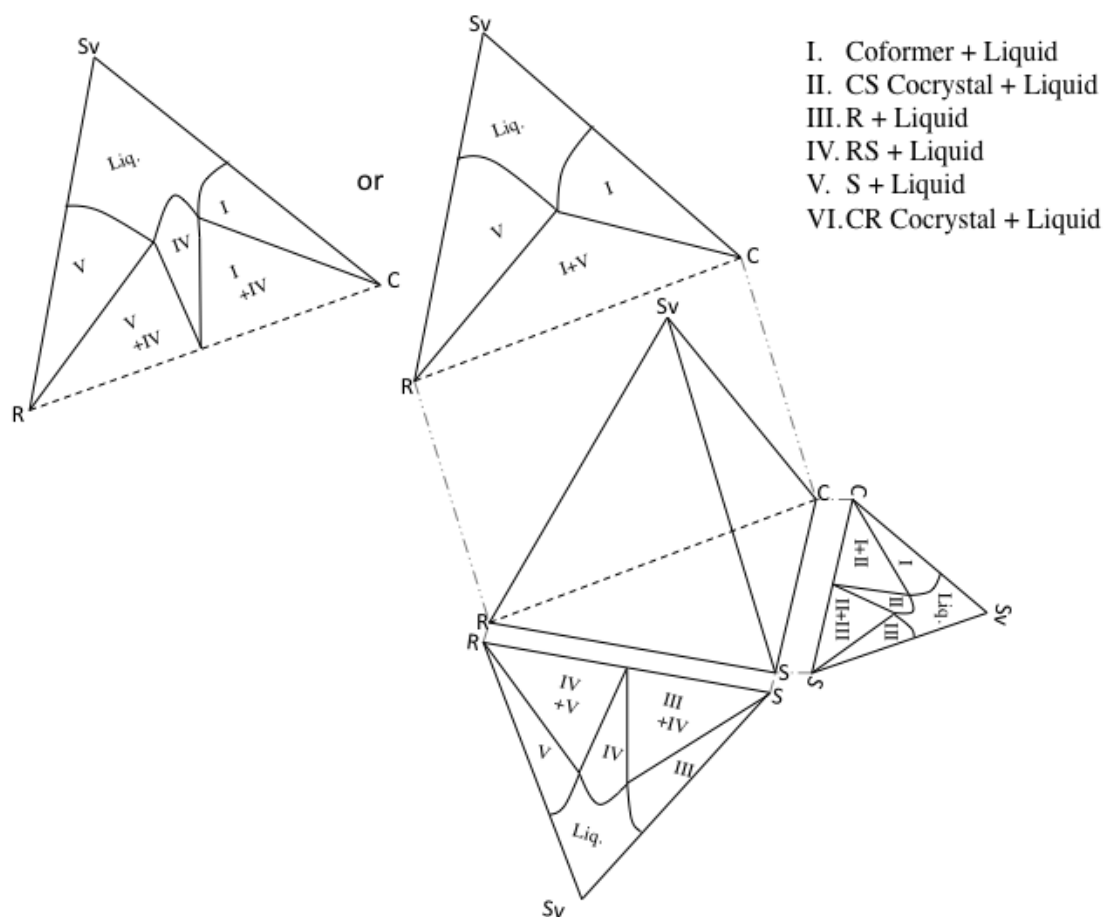

FIGURE 1. Schematic representation of a quaternary phase diagram, which can be used for a resolution through cocrystallization in solution. Both the enantiospecific, as well as the non-enantiospecific cases are represented.
